# Supplementary material for: The Effect of Metformin and GANT61 Combinations on the Radiosensitivity of Prostate Cancer Cells
Source: MDPI journal article supplement (doi:10.3390/ijms18020399), 2017-02-13
Supplement: s1 [file s1]

# Supplementary Materials: The Effect of Metformin and GANT61 Combinations on the Radiosensitivity of Prostate Cancer Cells

Annelies Gonnissen, Sofie Isebaert, Chad M. McKee, Ruth J. Muschel and Karin Haustermans

**Table S1.** Forward and reverse primer sequences used for quantitative polymerase chain reaction (qPCR).

| Gene         | Forward 5'–3'               | Reverse 5'–3'               |
|--------------|-----------------------------|-----------------------------|
| <i>GAPDH</i> | CCATCTTCCAGGAGCGAG          | TGAAGACGCCAGTGGAC           |
| <i>PTCH</i>  | AAACAGGTTACATGGATCAGATAATAG | CCCTTCCCAGAAGCAGT           |
| <i>GLI1</i>  | AATGCTGCCATGGATGCTAGA       | GAGTATCAGTAGGTGGGAAGTCCATAT |
| <i>GLI2</i>  | GCCCTCACCTCCATCAAT          | TGTTCTGGTTGGTGTCACT         |

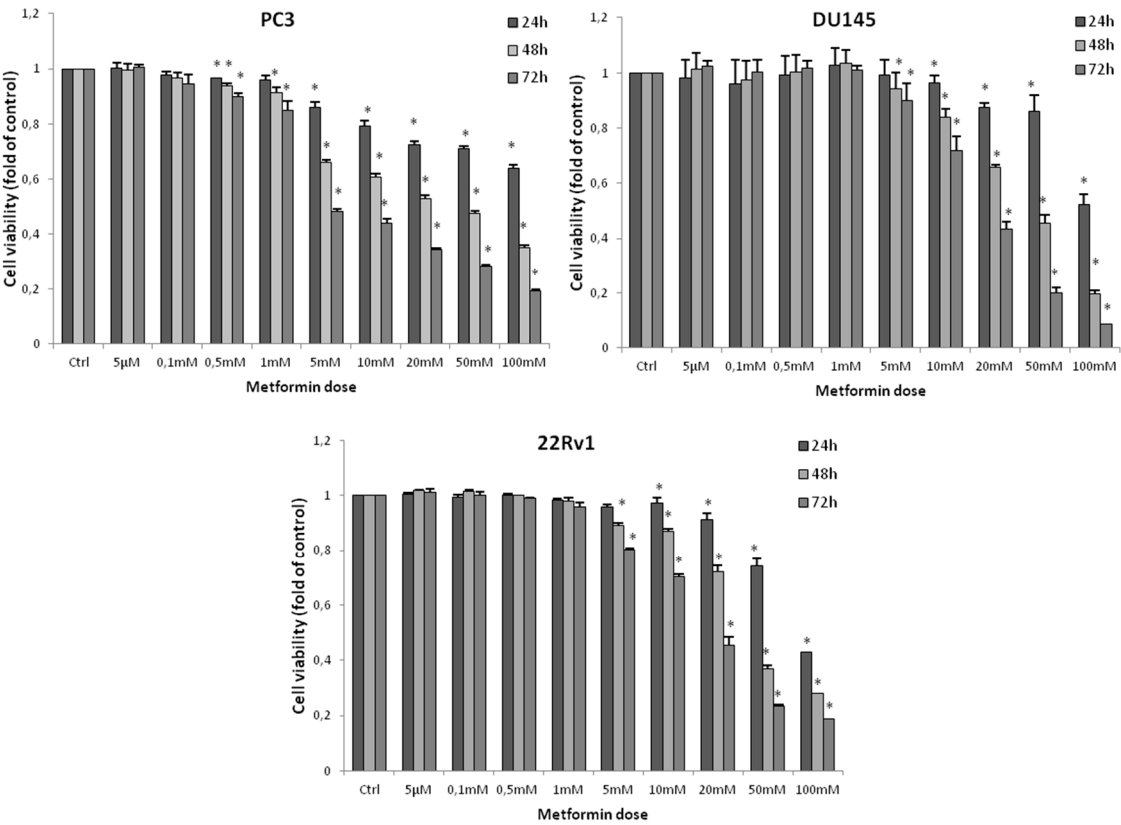

**Figure S1.** Cell viability (fold of control) after metformin treatment. Means ± standard error of the means (SEM) of two independent experiments. \*  $p < 0.05$  vs. control.

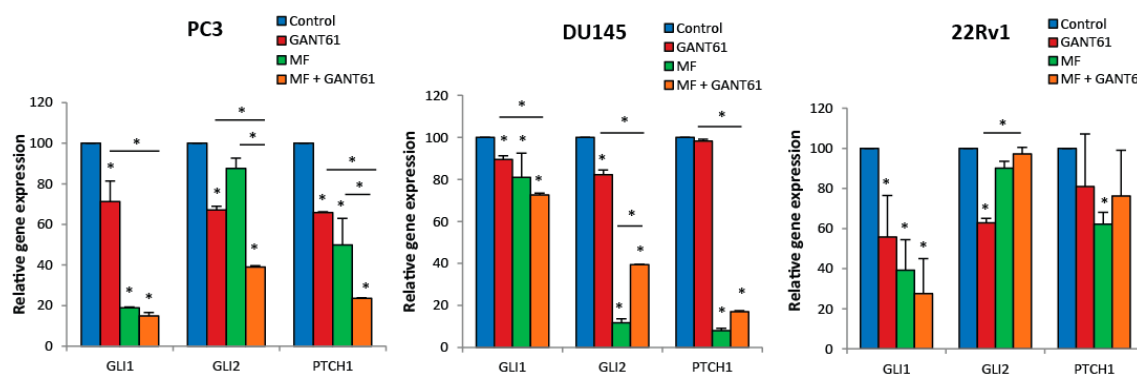

**Figure S2.** Hedgehog (Hh) gene expression after metformin (MF), GANT61 (GLI-ANTagonist 61) or combined treatment. *GLI1*, *GLI2* and *PTCH1* gene expression in PC3, DU145 and 22Rv1 cells after 72-h metformin (5 mM), GANT61 (10  $\mu$ M) or combination treatment. Means  $\pm$  SEM of two independent experiments performed in triplicate. \*  $p < 0.05$  vs. control. *GLI1*, glioma-associated oncogene homolog 1; *GLI2*, glioma-associated oncogene homolog 2; *PTCH1*, patched 1.

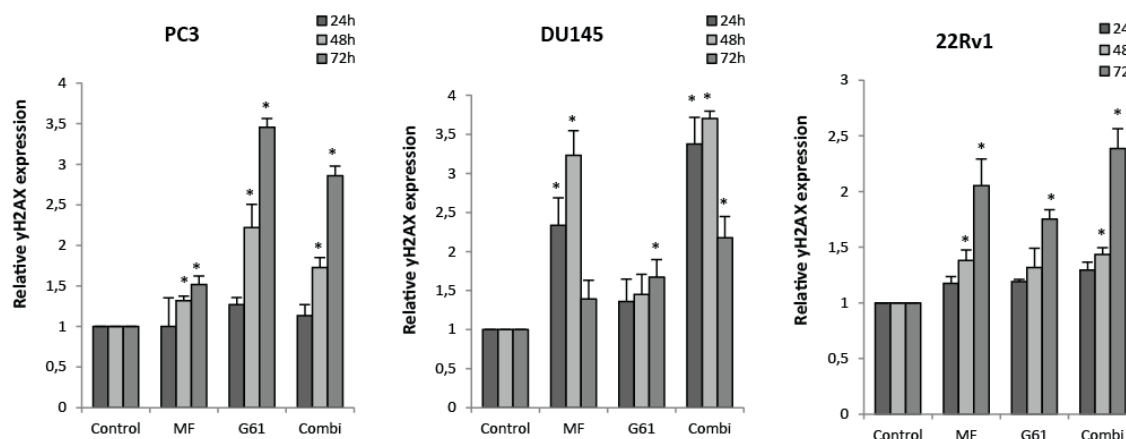

**Figure S3.** Effect of metformin and GANT61 (G61) on induction of DNA damage and phosphorylation of H2AX after 24-, 48- and 72-h drug treatment in PC3, DU145 and 22Rv1 cells. Cells were treated for 72 h with metformin (5 mM), GANT61 (10  $\mu$ M) or combination and cells were fixed at 24, 48 and 72 h of treatment. Means  $\pm$  SEM of three independent experiments. \*  $p < 0.05$  vs. control.
